# Supplementary material
Source: PubMed Central journal article supplement (PMC10162007)
Supplement: NIHMS1886466-supplement-Supp__Table_1.pdf [file NIHMS1886466-supplement-Supp__Table_1.pdf]

**Supplementary Table 1. The list of six pre-symptomatic HD patients, six HD patient fibroblasts, and twelve healthy control fibroblasts.**

| Line ID # | Genotype | Disease         | Sex    | Age at Sampling | Age at Disease Onset | CAG   |
|-----------|----------|-----------------|--------|-----------------|----------------------|-------|
| GM04855   | HD       | Pre-Symptomatic | Male   | 11              | 26                   | 47    |
| GM04861   | HD       | Pre-Symptomatic | Male   | 16              | 33                   | 45    |
| GM04831   | HD       | Pre-Symptomatic | Male   | 23              | 40                   | 43    |
| GM04829   | HD       | Pre-Symptomatic | Female | 21              | 34                   | 47    |
| GM04857   | HD       | Pre-Symptomatic | Female | 23              | 28                   | 40/50 |
| GM04717   | HD       | Pre-Symptomatic | Female | 44              | 60                   | 42    |
| ND30013   | HD       | Symptomatic     | Male   | 54              | 50                   | 43    |
| GM04230   | HD       | Symptomatic     | Male   | 55              | Not known            | 45    |
| GM02147   | HD       | Symptomatic     | Male   | 55              | Not known            | 45    |
| ND33947   | HD       | Symptomatic     | Female | 71              | 63                   | 40    |
| GM04198   | HD       | Symptomatic     | Female | 63              | Not known            | 47    |
| GM02173   | HD       | Symptomatic     | Female | 52              | Not known            | 44    |
| GM03440   | CTL      | Healthy         | Male   | 22              |                      |       |
| GM00495   | CTL      | Healthy         | Male   | 29              |                      |       |
| GM07492   | CTL      | Healthy         | Male   | 17              |                      |       |
| GM08399   | CTL      | Healthy         | Female | 19              |                      |       |
| GM02171   | CTL      | Healthy         | Female | 22              |                      |       |
| AG11732   | CTL      | Healthy         | Female | 24              |                      |       |
| AG04453   | CTL      | Healthy         | Male   | 52              |                      |       |
| AG10047   | CTL      | Healthy         | Male   | 53              |                      |       |
| AG12956   | CTL      | Healthy         | Male   | 50              |                      |       |
| GM02187   | CTL      | Healthy         | Female | 60              |                      |       |
| AG08379   | CTL      | Healthy         | Female | 60              |                      |       |
| AG11798   | CTL      | Healthy         | Female | 53              |                      |       |
