# Supplementary material
Source: PubMed Central journal article supplement (PMC10162007)

Extended Data Fig. 3a

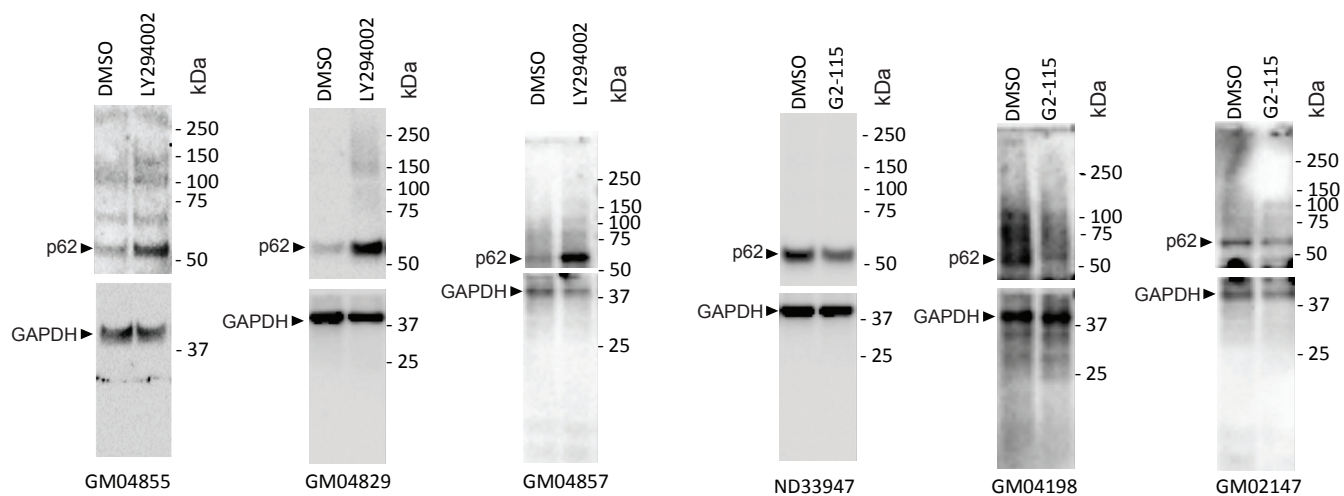

Supplement: NIHMS1886466-supplement-Source_Data_Extended_Data_Figure_3a.pdf [file NIHMS1886466-supplement-Source_Data_Extended_Data_Figure_3a.pdf]

**Extended Data Fig. 6e**

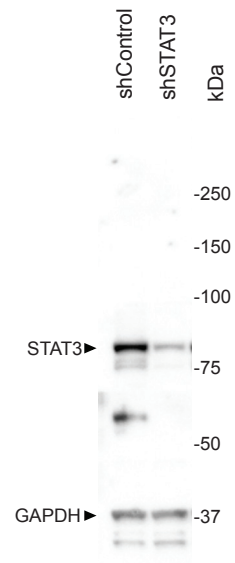

Supplement: NIHMS1886466-supplement-Source_Data_Extended_Data_Figure_6e.pdf [file NIHMS1886466-supplement-Source_Data_Extended_Data_Figure_6e.pdf]
